# Supplementary material
Source: PubMed Central journal article supplement (PMC3085381)
Supplement: gmb-34-1-88-suppl1.pdf [file gmb-34-1-88-suppl1.pdf]

## Supplementary Material

**Table S1** – Functional annotations off SSRs containing similarity with proteins in GenBank.

| SSR identification | Functional annotation             | First Hit - BlastX -NR                                                              | E-Value  | Gene Ontology / AmiGO annotation                                                                                                                                                              | PFAM DOMAIN                                                     |
|--------------------|-----------------------------------|-------------------------------------------------------------------------------------|----------|-----------------------------------------------------------------------------------------------------------------------------------------------------------------------------------------------|-----------------------------------------------------------------|
| SSR-IAC20          | Conserved hypothetical protein    | ref[XP_002326779.1  predicted protein [ <i>Populus trichocarpa</i> ]                | 7.41E-15 |                                                                                                                                                                                               |                                                                 |
| SSR-IAC22          | Gdsl-motif lipase hydrolase       | emb[CAO24082.1  unnamed protein product [ <i>Vitis vinifera</i> ]                   | 7.40E-19 | Lipid catabolic process (P); hydrolase activity, acting on ester bonds (F); extracellular region (C)                                                                                          | SGNH_plant_lipase_like                                          |
| SSR-IAC24          | Gag-protease poly protein         | emb[CAN81436.1  hypothetical protein [ <i>Vitis vinifera</i> ]                      | 1.43E-09 | F:peptidase activity                                                                                                                                                                          | Reverse transcriptase (RNA-dependent DNA polymerase) retrovirus |
| SSR-IAC27          | Adenosine nucleotide translocator | gb[EEF44404.1  ADP,ATP carrier protein, putative [ <i>Ricinus communis</i> ]        | 5.33E-06 | F:transporter activity; F: ATP:ADP transporter; C:integral to membrane; C:membrane; C:mitochondrial inner membrane; C:mitochondrion; P:transport; C:plasma membrane; C:chloroplast; F:binding | Mitochondrial carrier protein                                   |
| SSR-IAC29          | MADS box protein/ SEPALLATA1      | gb[ABD17386.1  MADS-box protein SEP3-1 [ <i>Taihangia rupestris</i> ]               | 4.00E-13 | F:sequence-specific DNA binding; F:transcription factor activity; P:regulation of transcription, DNA-dependent P: flower development                                                          | MADS BOX                                                        |
| SSR-IAC52          | Conserved hypothetical protein    | gb[ACJ85266.1  unknown [ <i>Medicago truncatula</i> ]                               | 5.04E-23 |                                                                                                                                                                                               |                                                                 |
| SSR-IAC53          | Zinc finger protein               | emb[CAN74885.1  hypothetical protein [ <i>Vitis vinifera</i> ]                      | 3.00E-34 | P:regulation of transcription; F:zinc ion binding; F:transcription factor activity                                                                                                            | ZnF_C2H2 domain                                                 |
| SSR-IAC58          | Leucine aminopeptidase            | gb[ACJ85545.1  unknown [ <i>Medicago truncatula</i> ]                               | 8.82E-17 | F:manganese ion binding; F:metalloexopeptidase activity; P:response to stress; F:aminopeptidase activity; C:chloroplast; P:proteolysis; F:zinc ion binding                                    | Cytosol aminopeptidase family                                   |
| SSR-IAC59          | RING finger protein               | gb[ACF79111.1  unknown [ <i>Zea mays</i> ]                                          | 4.53E-11 |                                                                                                                                                                                               | RING-finger (Really Interesting New Gene) domain                |
| SSR-IAC77          | Mads-box protein                  | gb[EES15309.1  hypothetical protein SORBIDRAFT_07g026200 [ <i>Sorghum bicolor</i> ] | 5.20E-22 | F:sequence-specific DNA binding; F:transcription factor activity; P:regulation of transcription, DNA-dependent P: flower development                                                          | MADS BOX                                                        |
| SSR-IAC83          | Arginine N-methyltransferase 6    | gb[ACU21309.1  unknown [ <i>Glycine max</i> ]                                       | 3.00E-16 | F : protein methyltransferase activity, F: protein amino acid methylation;                                                                                                                    | Methyltransferase domain                                        |

|            |                                    |                                                                                      |          |                                                                                                                                                                                                                                                                                                      |                                                            |
|------------|------------------------------------|--------------------------------------------------------------------------------------|----------|------------------------------------------------------------------------------------------------------------------------------------------------------------------------------------------------------------------------------------------------------------------------------------------------------|------------------------------------------------------------|
| SSR-IAC87  | Retrotransposon ty3-gypsy subclass | gb AAF13073.1  putative retroelement pol polyprotein [ <i>Arabidopsis thaliana</i> ] | 4.44E-09 | C:chromatin; F:chromatin binding; F:DNA binding; C:nucleus; F:nucleic acid binding; F:RNA binding; F:RNA-directed DNA polymerase activity; P:chromatin assembly or disassembly; P:DNA integration; F:aspartic-type endopeptidase activity; P:RNA-dependent DNA replication; P:proteolysis; C:plastid | RT_LTR: Reverse transcriptases (RTs) from retrotransposons |
| SSR-IAC91  | Conserved hypothetical protein     | emb CAN64580.1  hypothetical protein [ <i>Vitis vinifera</i> ]                       | 6.39E-04 |                                                                                                                                                                                                                                                                                                      |                                                            |
| SSR-IAC127 | Photosystem I subunit b            | gb ABW22789.1  photosystem I P700 apoprotein A2 [ <i>Phaseolus vulgaris</i> ]        | 2.03E-48 | F:electron carrier activity; F:iron ion binding; P:transport; F:magnesium ion binding; P:protein-chromophore linkage; F:chlorophyll binding; F:4 iron, 4 sulfur cluster binding; C:integral to membrane; C:chloroplast; C:thylakoid; C:photosystem I; P:photosynthesis; P:electron transport chain   | Photosystem I psaA/psaB protein                            |
| SSR-IAC129 | Putative athila transposon protein | pir S66306 hypothetical protein 1 - <i>Arabidopsis thaliana</i> retrotransposon      | 2.00E-04 |                                                                                                                                                                                                                                                                                                      |                                                            |
| SSR-IAC179 | Retrotransposon ty3-gypsy subclass | gb AAD19359.1  polyprotein [ <i>Sorghum bicolor</i> ]                                | 1.16E-11 | F:RNA binding; F:nucleic acid binding; C:mitochondrion; P:DNA integration; P:RNA-dependent DNA replication; F:ribonuclease H activity; F:RNA-directed DNA polymerase activity; F:DNA binding                                                                                                         | RT_LTR: Reverse transcriptases (RTs) from retrotransposons |
| SSR-IAC180 | Hypothetical protein               | gb EDL79735.1  similar to FLJ46154 protein (predicted) [ <i>Rattus norvegicus</i> ]  | 5.90E-11 |                                                                                                                                                                                                                                                                                                      |                                                            |
| FJUNA245   | Clathrin assembly protein          | ref XP_002324864.1  predicted protein [ <i>Populus trichocarpa</i> ]                 | 8.00E-16 | F: phosphatidylinositol binding; F: clathrin binding; F: clathrin coat assembly; P: clathrin coat assembly                                                                                                                                                                                           | ANTH domain family                                         |
| FJUNA390   | ADP,ATP carrier protein            | gb ACU21147.1  unknown [ <i>Glycine max</i> ]                                        | 2.00E-08 | F:transporter activity; F: ATP:ADP transporter; C:integral to membrane; C:membrane; C:mitochondrial inner membrane; C:mitochondrion; P:transport; C:plasma membrane; C:chloroplast; F:binding                                                                                                        | Mitochondrial carrier protein                              |
