# Supplementary material
Source: PubMed Central journal article supplement (PMC3085381)
Supplement: gmb-34-1-88-suppl2.pdf [file gmb-34-1-88-suppl2.pdf]

**Table S2** - SSRs contains similarity with ESTs deposited in the dBEST databank.

| SSR identification | First Hit - BlastN - dBEST                                                                                                                              | E-value   |
|--------------------|---------------------------------------------------------------------------------------------------------------------------------------------------------|-----------|
| SSR-IAC20          | gb FF382201.1  MOOA033TF MOO <i>Vigna unguiculata</i> cDNA 5', mRNA sequence                                                                            | 1.00E-129 |
| SSR-IAC22          | gb FE699854.1  Pv026A_M13F_D11.ab1 <i>Phaseolus vulgaris</i> cv Early gallatin <i>Phaseolus vulgaris</i> cDNA, mRNA sequence                            | 6.53E-161 |
| SSR-IAC24          | gb FE705466.1  Pv041C_M13R_F06.ab1 <i>Phaseolus vulgaris</i> cv Early gallatin <i>Phaseolus vulgaris</i> cDNA, mRNA sequence                            | 1.00E-25  |
| SSR-IAC27          | gb FD792254.1  08VNAA8_T7_004_C06_17FEB2006_044 08VNAA8 <i>Phaseolus vulgaris</i> cDNA, mRNA sequence                                                   | 6.00E-34  |
| SSR-IAC29          | gb FK603857.1  454GmaGlobSeed338489 Soybean seeds containing globular-stage embryos <i>Glycine max</i> cDNA, mRNA sequence                              | 3.00E-77  |
| SSR-IAC52          | gb FE712003.1  Pv053D_M13F_H04.ab1 <i>Phaseolus vulgaris</i> cv Early gallatin <i>Phaseolus vulgaris</i> cDNA, mRNA sequence                            | 6.54E-80  |
| SSR-IAC53          | gb GO036303.1  LJNBX65TF JCVI-LJ3 <i>Lotus japonicus</i> cDNA 5', mRNA sequence                                                                         | 9.00E-77  |
| SSR-IAC58          | gb CV530950.1  ALV_015B_G12 <i>Phaseolus vulgaris</i> leaf EST library PV_GEa <i>Phaseolus vulgaris</i> cDNA clone PV_GEa0015B_G12.b1 5', mRNA sequence | 5.00E-74  |
| SSR-IAC59          | gb FE709594.1  Pv016C_M13F_H11.ab1 <i>Phaseolus vulgaris</i> cv Early gallatin <i>Phaseolus vulgaris</i> cDNA, mRNA sequence                            | 6.00E-60  |
| SSR-IAC62          | gb FK005441.1  GLMDM32TR JCVI-SOY2 <i>Glycine max</i> cDNA 5', mRNA sequence                                                                            | 2.74E-01  |
| SSR-IAC63          | gb FE703648.1  Pv035B_M13R_D10.ab1 <i>Phaseolus vulgaris</i> cv Early gallatin <i>Phaseolus vulgaris</i> cDNA, mRNA sequence                            | 2.00E-34  |
| SSR-IAC66          | gb FF537441.1  MOPAX37TF MOP <i>Vigna unguiculata</i> cDNA 5', mRNA sequence                                                                            | 2.00E-34  |
| SSR-IAC68          | gb CA908042.1  PCSC10299 Scarlet runner bean suspensor region TriplEx2 <i>Phaseolus coccineus</i> cDNA 5' similar to chitinase, mRNA sequence           | 2,00E-16  |
| SSR-IAC73          | gb CV540212.1  POD_028_F12 <i>Phaseolus vulgaris</i> pod EST library <i>Phaseolus vulgaris</i> cDNA 5', mRNA sequence                                   | 1.00E-17  |

|            |                                                                                                                                                                           |           |
|------------|---------------------------------------------------------------------------------------------------------------------------------------------------------------------------|-----------|
| SSR-IAC77  | gb EV263457.1  GLLA690TF JCVI-SOY1 <i>Glycine max</i> cDNA 5', mRNA sequence                                                                                              | 4.00E-96  |
| SSR-IAC83  | gb FG851828.1 UCRVU05_CCNN17663_b1 Cowpea IT84S-2049 mixed tissue and conditions cDNA library UCRVU05-2-2 <i>Vigna unguiculata</i> cDNA clone CCNN17663.b1, mRNA sequence | 1.24E-67  |
| SSR-IAC87  | gb FE700691.1  Pv027D_M13F_E08.ab1 <i>Phaseolus vulgaris</i> cv Early gallatin <i>Phaseolus vulgaris</i> cDNA, mRNA sequence                                              | 5.00E-09  |
| SSR-IAC91  | gb BG406131.1  sac34e04.y1 Gm-c1051 <i>Glycine max</i> cDNA clone genome systems clone id: Gm-c1051-4064 5kD protein in copia-like transposable element                   | 1.00E-08  |
| SSR-IAC96  | gb CB540465.1  PVEPSE2019H06.g Common bean seedling EST Library - PVEPSE2 <i>Phaseolus vulgaris</i> cDNA clone PVEPSE2019H06 5', mRNA sequence                            | 4.00E-47  |
| SSR-IAC97  | gb CD413738.1  Gm_ck45339 Soybean induced by salicylic acid <i>Glycine max</i> cDNA 3', mRNA sequence                                                                     | 4.00E-32  |
| SSR-IAC100 | gb BG406131.1  gm-c1051 <i>Glycine max</i> cDNA clone genome systems clone id: gm-c1051-4064 5 tr:q04357 q04357 hypothetical kd protein in copia-like transposable mRNA   | 9.88E-04  |
| SSR-IAC127 | gb ES672667.1  AcSSH_FS_0836 Forward subtracted <i>Ancylostoma caninum</i> L3 library                                                                                     | 9.00E-127 |
| SSR-IAC136 | gb CK171252.1  FGAS046428 <i>Triticum aestivum</i> FGAS: TaLt6 <i>Triticum aestivum</i> cDNA                                                                              | 5.00E-124 |
| SSR-IAC156 | gb FE709251.1  Pv055C_M13F_H11.ab1 <i>Phaseolus vulgaris</i> cv Early gallatin <i>Phaseolus</i>                                                                           | 4.00E-61  |
| SSR-IAC160 | gb FE693875.1  Pv030C_M13F_B12.ab1 <i>Phaseolus vulgaris</i> cv Early gallatin <i>Phaseolus</i>                                                                           | 3.00E-38  |
| SSR-IAC167 | gb BF070127.1  st07e06.y1 Gm-c1065 <i>Glycine max</i> cDNA clone genome systems clone id: Gm-c1065-635 5' similar to TR:O48794 O48794 F24O1.2                             | 4.00E-66  |
| SSR-IAC179 | gb DN153780.1  Pv-cl56r <i>Phaseolus vulgaris</i> (variety OAC Rex)                                                                                                       | 4.00E-10  |
| SSR-IAC181 | gb FK022894.1  GLRA967TF JCVI-SOY3 <i>Glycine max</i> cDNA 5', mRNA sequence                                                                                              | 1.00E-68  |

|          |                                                                                                                                                                        |          |
|----------|------------------------------------------------------------------------------------------------------------------------------------------------------------------------|----------|
| FJUNA128 | gb FK425847.1  454 globseed160479 Soybean seeds containing globular-stage embryos <i>Glycine max</i> mRNA                                                              | 7.09E-41 |
| FJUNA167 | dbj DB956508.1  Full-length enriched soybean cDNA library, mixture of seedling, young plant, adult plant <i>Glycine max</i> cDNA clone GMFL02-03-P15 5-, mRNA sequence | 7.44E-11 |
| FJUNA245 | gb CV530406.1  alv_013c_f09 <i>Phaseolus vulgaris</i> leaf EST library pv_gea <i>Phaseolus vulgaris</i> cDNA clone 5 mRNA                                              | 0.0      |
| FJUNA390 | gb FE675931.1  Pv012A_M13R_D12.ab1 <i>Phaseolus vulgaris</i> cv Early gallatin <i>Phaseolus vulgaris</i> cDNA, mRNA sequence                                           | 4.28E-36 |
| FJUNA399 | gb EC911884.1  2479 Tepary bean root cDNA <i>Phaseolus acutifolius</i> cDNA clone mRNA                                                                                 | 1.84E-25 |

---
